# Supplementary material for: Erythrocytes-based quartz crystal microbalance cytosensor for in situ detection of cell surface sialic acid
Source: Royal Society of Chemistry journal article supplement (doi:10.1039/c7an00073a), 2017-01-01
Supplement: c7an00073a1.pdf [file c7an00073a1.pdf]

## Supplementary information

### Erythrocytes-based quartz crystal microbalance cytosensor for in situ detection of cell surface sialic acid

Xiaojuan Yang‡, Lin Zhou‡, Yan Hao, Bin Zhou, Peihui Yang\*

Department of Chemistry, Jinan University, Guangzhou, Guangdong 510632, People's  
Republic of China

‡These authors contributed equally to this paper and share the first authorship.

\*Corresponding author: Peihui Yang, Ph.D, Professor Department of Chemistry, Jinan University Guangzhou 510632, PR China

E-mail: typh@jnu.edu.cn

Tel/Fax: +86-20-85223039

Table S1 Infrared absorption spectrum of samples.

| Sample     | B-O  | C=O  | C-N  | Ar-H    | N-H       |
|------------|------|------|------|---------|-----------|
| APBA       | 1357 | ---  | ---  | 900、609 | 3477、3392 |
| AuNPs/APBA | 1330 | 1635 | 1568 | 885、669 | 3426      |

Table S2 Measured parameters of erythrocytes membrane of normal and diabetes by atomic force microscopy.

| Type of cell                                 | Particle<br>analysis (nm) | R <sub>q</sub> (nm) | R <sub>a</sub> (nm) |
|----------------------------------------------|---------------------------|---------------------|---------------------|
| (A) Normal RBCs                              | 37.52±11.11               | 2.60±0.56           | 2.07±0.32           |
| (B) Diabetes RBCs                            | 11.17±7.23                | 1.82±0.91           | 1.51±0.63           |
| (C) Normal RBCs treated with<br>AuNPs/APBA   | 97.27±9.01                | 5.84±1.21           | 4.05±0.81           |
| (D) Diabetes RBCs treated with<br>AuNPs/APBA | 62.54±15.81               | 3.74±0.71           | 2.58±0.32           |

Fig. S1

Quantitative detection of SA expression on diabetes RBCs surface by proposed cytosensor, as shown in Fig.S1. The QCM frequency response exhibited a linear response toward the captured RBCs from  $7.1 \times 10^3$  to  $1.2 \times 10^4$ . The regression equation is

$$-\Delta f = 0.039 N - 41.28 \quad R^2 = 0.9811 \quad \dots\dots\dots (1')$$

Furthermore, Fig. S1B displayed linear relationship between reduction value of QCM frequency response ( $\Delta F$ ) and free SA concentration on AuNPs/APBA nanoprobe. The regression equation is

$$\Delta F = 286.2 C_{SA} + 789.91 \quad R^2 = 0.9971 \quad \dots\dots\dots (2')$$

The average number of SA per captured diabetes RBC was calculated to be  $(8.2 \pm 0.7) \times 10^7$  using Eqs. (1') and (2').

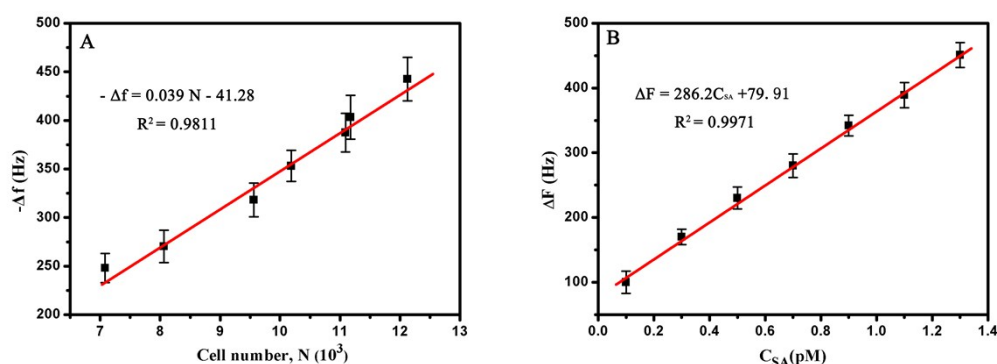

Fig. S1 Quantitative detection of SA expression on diabetes RBCs

- (A) The linear relationship of  $\Delta f$  signal vs numbers of captured diabetes RBCs ( $N$ ) on the cytosensor. (B) Effect of the free SA concentration ( $C_{SA}$ ) on the decrease of frequency response.
